# Supplementary material for: Multiresolution quantification of deciduousness in West-Central African forests
Source: Copernicus journal article supplement (doi:10.5194/bg-10-6957-2013), 2013-11-04

1 **Supplementary Material**

2 **Appendix S1:** Distributions of middle-infrared reflectance values (MIR) for the different  
3 forest classes. Box-plots summarize the MIR values aggregated between 2000 and 2011 for  
4 each wet and dry seasons. For the swamp forests class, MIR values are significantly lower  
5 than any other class, especially in the dry season, ( $p < 0.0001$ ).

6 **Appendix S2:** Land cover map of Africa over the study area produced at a spatial resolution  
7 of 1 km by Mayaux et al. (2004).

8

9

10

11

12

13

14

15

16

17

18

19

20

21

22

23

24

25 **Appendix S1:** Distributions of middle-infrared reflectance values (MIR) for the different  
26 forest classes. Box-plots summarize the MIR values aggregated between 2000 and 2011 for  
27 each wet and dry seasons.

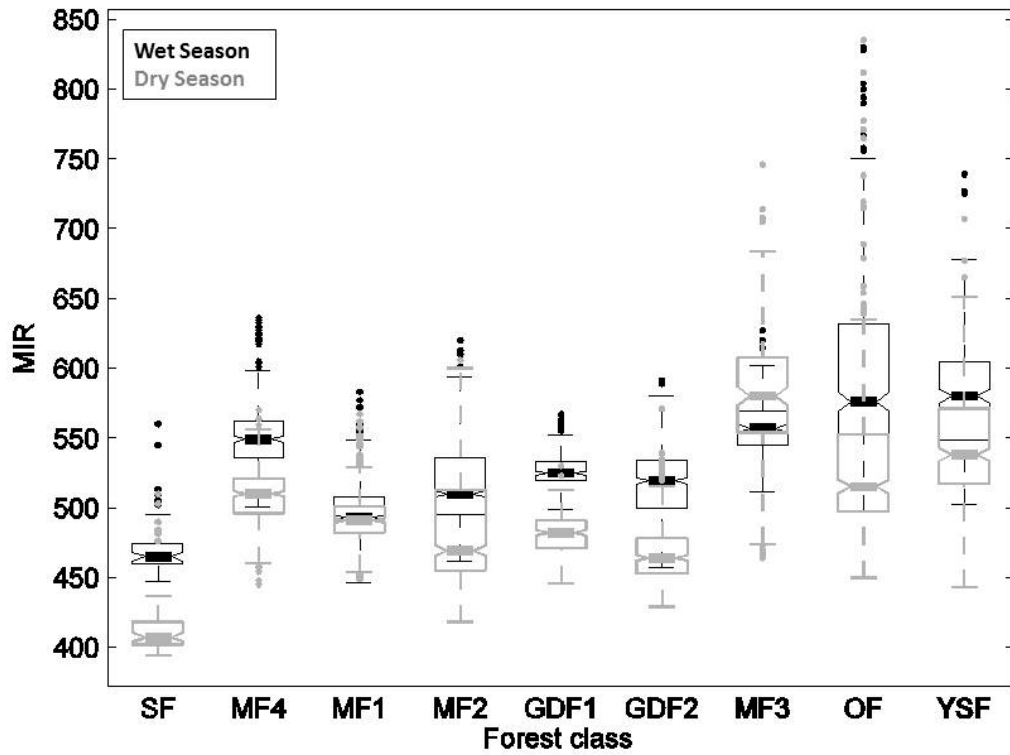

28  
29  
30  
31  
32  
33  
34  
35  
36  
37  
38  
39  
40  
41

42 **Appendix S2:** Land cover map of Africa over the study area produced at a spatial resolution  
43 of 1 km by Mayaux et al. (2004).

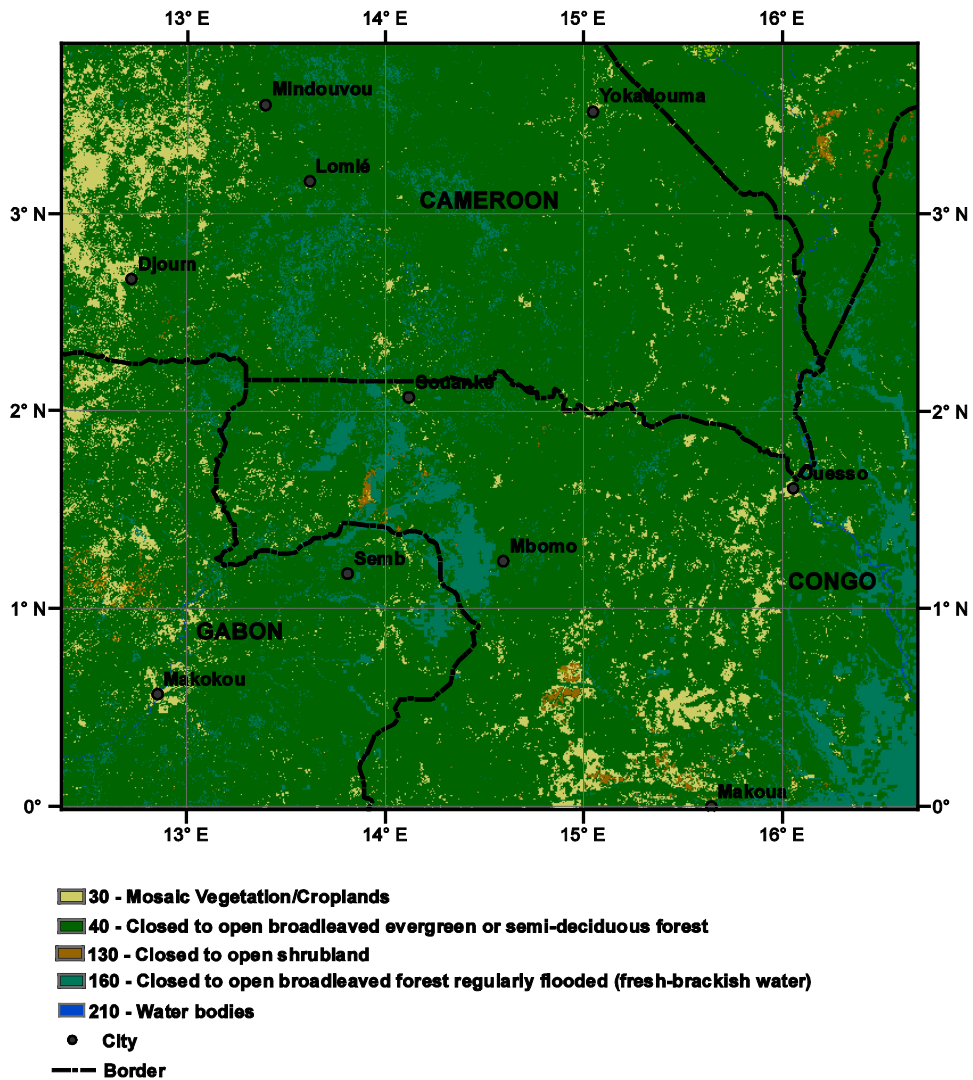

Supplement: Supplementary file 1 [file bg-10-6957-2013-supplement.pdf]
